# Supplementary material for: Autologous reconstitution of human cancer and immune system in vivo
Source: PubMed Central journal article supplement (PMC5356779; doi:10.18632/oncotarget.14026), 2016-12-19
Supplement: oncotarget-08-2053-s001.pdf [file oncotarget-08-2053-s001.pdf]

# Autologous reconstitution of human cancer and immune system *in vivo*

## Supplementary Material

**a.**

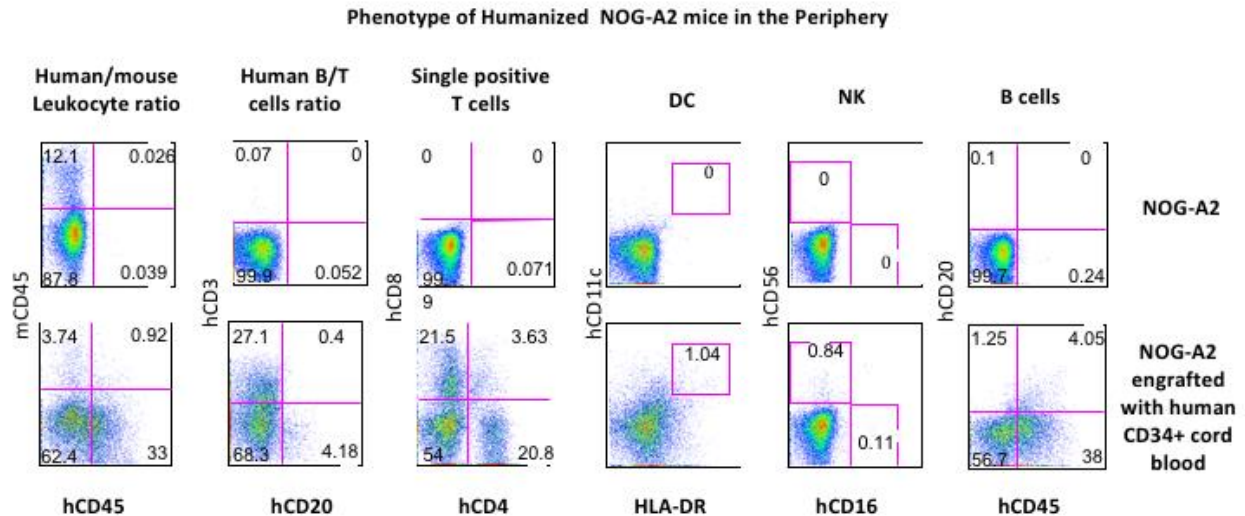

**b.**

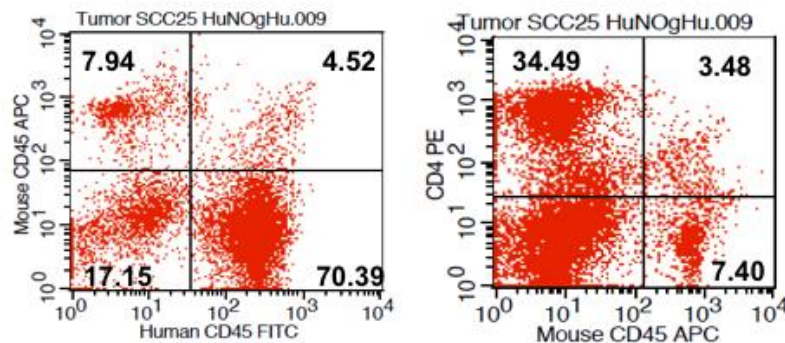

**Supplemental Fig. 1.** Allogeneic reconstitution of HLA-A2+ HNSCC tumor in humanized mice engrafted with HLA-A2+ cord blood. **a.** CD34+ cord blood cells from HLA-A2+ subjects were engrafted into NOG-A2 mice and their peripheral blood demonstrated human B-cells, single positive T-cells, dendritic cells, and NK cells. **b.** HLA-A2+ HNSCC cell line SCC25 ( $10^6$ ) was

injected into the subcutaneous tissue, and once the tumor was over 10mm, the tumor infiltrating leukocytes segregated with Ficoll gradient and stained for both murine and human T-cells.

Mononuclear TILs were stained for murine and human CD45 (left panel). Significant abundance of human CD4 were found in this ungated mononuclear population (right panel).

|

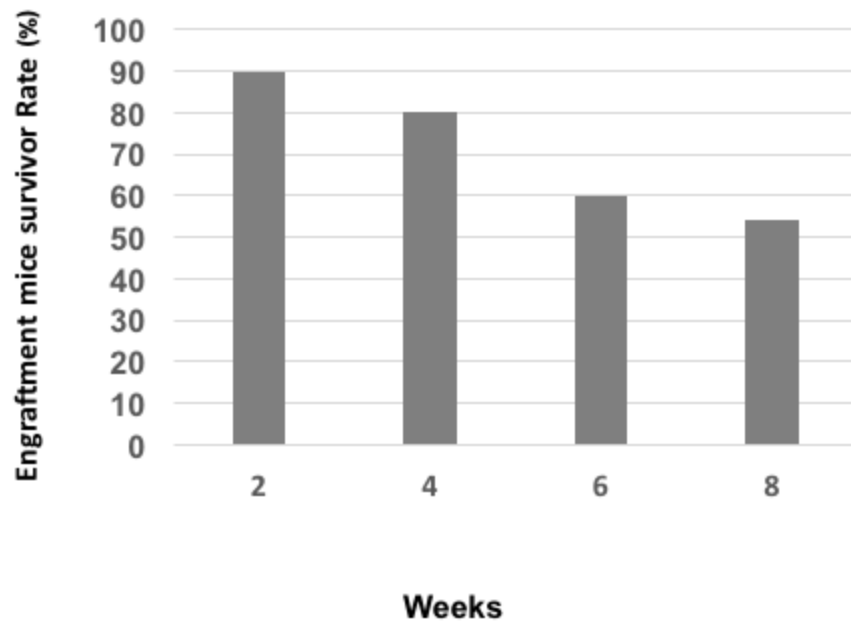

**Supplemental Fig. 2.** Depicted are the cumulative engraftment rates of CD34+ BMC.

Approximately 110 mice were engrafted and their survival rates were noted till 8 weeks post adoptive transfer. One patient donor typically yielded 8-12 engrafted mice.

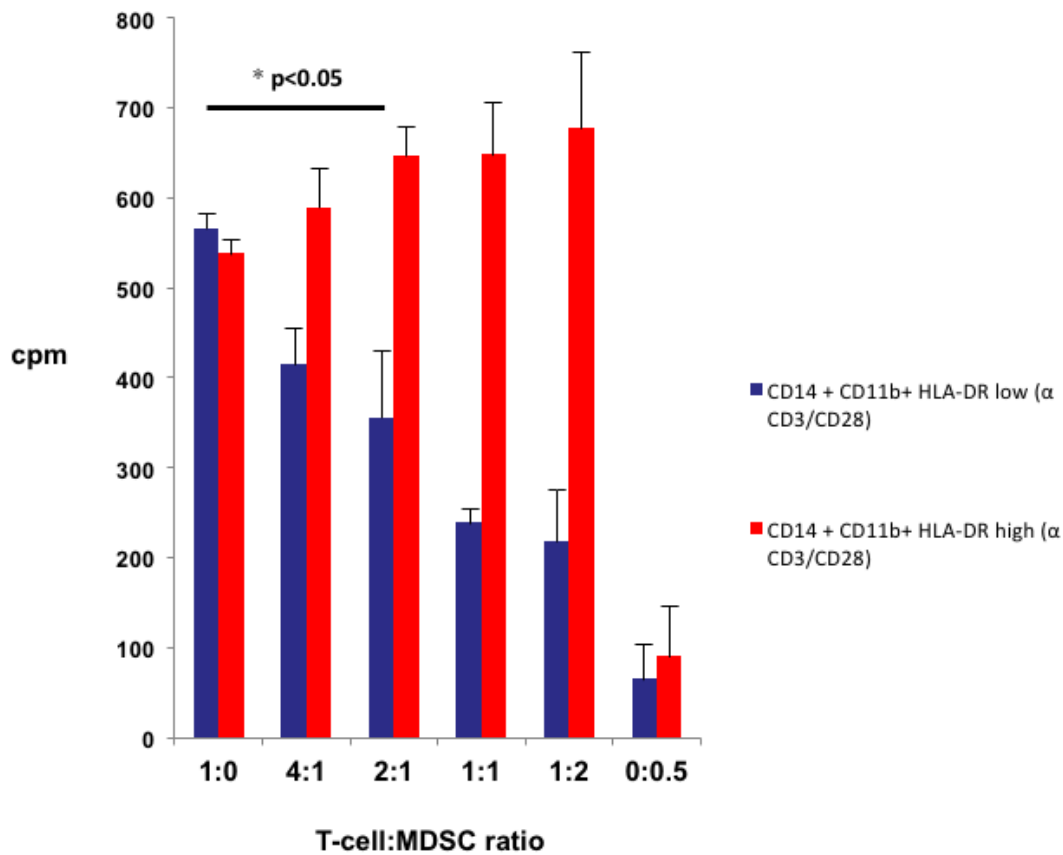

**Supplemental Fig. 3.** T-cell suppressive activity of MDSC sorted from tumor bearing humanized mice. CD14<sup>+</sup>DR<sup>low</sup> and CD14<sup>+</sup>DR<sup>high</sup> cells from the spleen were sorted and mixed with human T-cells from normal subjects under T-cell stimulating conditions. T-cell and MDSC were mixed in ratios as indicated and <sup>3</sup>H-thymidine uptake of T-cells analyzed as measured in cpm. At 2:1 ratio of T-cells and MDSC, CD3/CD28 induced T-cell stimulation were suppressed at a significant level (p<0.05). Assays were performed in triplicates.
